# Supplementary material for: How primary healthcare workers obtain information during consultations to aid safe prescribing in low-income and lower middle-income countries: a systematic review
Source: PubMed Central journal article supplement — BMJ Glob Health. 2020 Apr 2;5(4):e002094. doi: 10.1136/bmjgh-2019-002094 (PMC7170426; doi:10.1136/bmjgh-2019-002094), 2020-04-02
Supplement: bmjgh-2019-002094supp002.pdf [file bmjgh-2019-002094supp002.pdf]

## Supplementary File 2: Excluded Full Text Papers

| Study ID | First author (publication year) | Title                                                                                                                                                                                                                                       | Reason for exclusion                                             |
|----------|---------------------------------|---------------------------------------------------------------------------------------------------------------------------------------------------------------------------------------------------------------------------------------------|------------------------------------------------------------------|
| 1        | Abeyseena (2010)                | Evidence-based medicine knowledge, attitudes, and practices among doctors in Sri Lanka                                                                                                                                                      | Participants are not primary healthcare workers                  |
| 3        | Adams (2014)                    | Ending neglect: providing effective childhood tuberculosis training for health care workers in Tanzania                                                                                                                                     | Not about using information for prescribing during consultations |
| 4        | Ade (2013)                      | Management of asthma in Benin: the challenge of loss to follow-up                                                                                                                                                                           | Not about using information for prescribing during consultations |
| 5        | Adibe (2010)                    | Assessment of attitude and behavior of health professionals towards provision of drug information services in Enugu state                                                                                                                   | Participants are not primary healthcare workers                  |
| 6        | Adu-Sarkodie (2000)             | Syndromic management of urethral discharge in Ghanaian pharmacies                                                                                                                                                                           | Not about using information for prescribing during consultations |
| 7        | Afrasiabian (2017)              | Investigation of the knowledge, attitude and performance of the physicians in regard to rational antibiotic prescription                                                                                                                    | Not in English                                                   |
| 9        | Deepalakshmi (2016)             | Knowledge, Attitude and Practice of Community Pharmacists towards Cognitive Pharmaceutical Care Services in Tamil Nadu, India                                                                                                               | Not about using information for prescribing during consultations |
| 10       | Denig (2002)                    | Scope and nature of prescribing decisions made by general practitioners                                                                                                                                                                     | Not in a LMIC                                                    |
| 11       | Diouf (2005)                    | Dakar physicians' therapeutic attitude towards non complicated peptic ulcer disease                                                                                                                                                         | Not in English                                                   |
| 12       | Dooling (2014)                  | Understanding Antibiotic Use in Minya District, Egypt: Physician and Pharmacist Prescribing and the Factors Influencing Their Practices                                                                                                     | Not about using information for prescribing during consultations |
| 13       | Frankenthal (2014)              | Intervention with the screening tool of older persons potentially inappropriate prescriptions/screening tool to alert doctors to right treatment criteria in elderly residents of a chronic geriatric facility: a randomized clinical trial | Not in a LMIC                                                    |
| 14       | Gautham (2015)                  | Mobile phone-based clinical guidance for rural health providers in India                                                                                                                                                                    | Not about using information for prescribing during consultations |
| 15       | Grusky (2003)                   | Evaluation of a brief low-cost intervention to improve antiretroviral treatment decisions                                                                                                                                                   | Not in a LMIC                                                    |
| 16       | Guiscafre (2003)                | Quality improvement of integrated child health care management after in-service training for physicians                                                                                                                                     | Not about using information for prescribing during consultations |
| 17       | Gupta (2008)                    | A study of drug information seeking behaviour in medical professionals                                                                                                                                                                      | Hospital setting                                                 |
| 18       | Hooft (2017)                    | Principles, practices and knowledge of clinicians when assessing febrile children: a qualitative study in Kenya                                                                                                                             | Not about using information for prescribing during consultations |
| 19       | Senya (2017)                    | Use of smartphone applications for clinical decision making in a poor country: an exploratory study of smartphone use among medical practitioners in Ghana                                                                                  | participants are not primary healthcare workers                  |
| 20       | Sabin (2017)                    | Benefits and limitations of text messages to stimulate higher learning among community providers: participants' views of an mHealth intervention to support continuing medical education in Vietnam                                         | Not about using information for prescribing during consultations |

|    |                      |                                                                                                                                                                          |                                                                  |
|----|----------------------|--------------------------------------------------------------------------------------------------------------------------------------------------------------------------|------------------------------------------------------------------|
| 22 | Samuel (2014)        | Utilization of recently established drug information centers located in the public hospitals of Addis Ababa, Ethiopia: An assessment                                     | Not about using information for prescribing during consultations |
| 23 | Sangho (2005)        | Attitude and practice of health staff in the management of simple malaria in the health district of niono in mali                                                        | Not in English                                                   |
| 24 | Sarrasat (2011)      | Management of uncomplicated malaria in children under 13 years of age at a district hospital in Senegal: from official guidelines to usual practices                     | Hospital setting                                                 |
| 25 | Saruchera (2004)     | Medication counseling in Zimbabwe [4]                                                                                                                                    | Not about using information for prescribing during consultations |
| 26 | Satyanarayana (2014) | Use of rapid point-of-care tests by primary health care providers in India: findings from a community-based survey                                                       | Not about using information for prescribing during consultations |
| 27 | Satyanarayana (2016) | Use of standardised patients to assess antibiotic dispensing for tuberculosis by pharmacies in urban India: a cross-sectional study                                      | Not about using information for prescribing during consultations |
| 28 | Saurabh (2011)       | Study of prescribing habits and assessment of rational use of drugs among doctors of primary health care facilities                                                      | Not about using information for prescribing during consultations |
| 29 | Sayang (2009)        | Treatment of malaria from monotherapy to artemisinin-based combination therapy by health professionals in urban health facilities in Yaounde, central province, Cameroon | Not about using information for prescribing during consultations |
| 30 | Rutta (2014)         | Understanding private retail drug outlet dispenser knowledge and practices in tuberculosis care in Tanzania                                                              | Not about using information for prescribing during consultations |
| 32 | Rumel (2006)         | Drug interchangeability: clinical approach and consumer's point of view                                                                                                  | Not original research                                            |
| 33 | Roy (2007)           | Drug promotional practices in Mumbai: a qualitative study                                                                                                                | Not about using information for prescribing during consultations |
| 34 | Rowe (2009)          | Quality of malaria case management at outpatient health facilities in Angola                                                                                             | Not about using information for prescribing during consultations |
| 35 | Rowe (2001)          | Management of childhood illness at health facilities in Benin: problems and their causes                                                                                 | Not about using information for prescribing during consultations |
| 36 | Riaz (2015)          | Prescribing of bisphosphonates and antibiotics in Pakistan: Challenges and opportunities for the future                                                                  | Not about using information for prescribing during consultations |
| 37 | Rasti (2017)         | Health care workers' perceptions of point-of-care testing in a low-income country-A qualitative study in Southwestern Uganda                                             | Not about using information for prescribing during consultations |
| 38 | Rashidian (2013)     | The perspectives of Iranian physicians and patients towards patient decision aids: a qualitative study                                                                   | Not in a LMIC                                                    |
| 40 | Rakow (2001)         | Differences in belief about likely outcomes account for differences in doctors' treatment preferences: but what accounts for the differences in belief                   | Hospital setting                                                 |
| 42 | Reshma (2008)        | Survey and evaluation of prescription drugs dispensed without a valid prescription in three community pharmacies of South India                                          | Not about using information for prescribing during consultations |
| 43 | Raghu (2015)         | Engineering a mobile health tool for resource-poor settings to assess and manage cardiovascular disease risk: SMARThealth study                                          | Not about using information for prescribing during consultations |
| 44 | Pulford (2016)       | Health Worker Compliance with a 'Test And Treat' Malaria Case Management Protocol in Papua New Guinea                                                                    | Not about using information for prescribing during consultations |
| 45 | Pulford (2013)       | Malaria case management in Papua New Guinea following the introduction of a revised treatment protocol                                                                   | Not about using information for prescribing during consultations |
| 46 | Pulford (2012)       | Malaria case management in Papua New Guinea prior to the introduction of a revised treatment protocol                                                                    | Not about using information for prescribing during consultations |

|    |                                |                                                                                                                                                                                                                                           |                                                                  |
|----|--------------------------------|-------------------------------------------------------------------------------------------------------------------------------------------------------------------------------------------------------------------------------------------|------------------------------------------------------------------|
| 48 | Praveen (2013)                 | A multifaceted strategy using mobile technology to assist rural primary healthcare doctors and frontline health workers in cardiovascular disease risk management: protocol for the SMARTHealth India cluster randomised controlled trial | Research protocol                                                |
| 50 | Parveen (2016)                 | Drug utilization pattern using WHO prescribing, patient care and health facility indicators in a primary and secondary health care facility                                                                                               | Not about using information for prescribing during consultations |
| 51 | Patel (2003)                   | Exclude                                                                                                                                                                                                                                   | Not about using information for prescribing during consultations |
| 52 | Pavin (2003)                   | Prescribing practices of rural primary health care physicians in Uzbekistan                                                                                                                                                               | Not about using information for prescribing during consultations |
| 54 | Peters (2006)                  | Can computers improve patient care by primary health care workers in India?                                                                                                                                                               | Not about using information for prescribing during consultations |
| 55 | Pham (2013)                    | Improving Pharmacy Staff Knowledge and Practice on Childhood Diarrhea Management in Vietnam: Are Educational Interventions Effective?                                                                                                     | Not about using information for prescribing during consultations |
| 56 | Phua (2008)                    | How residents and interns utilise and perceive the personal digital assistant and UpToDate                                                                                                                                                | Hospital setting                                                 |
| 57 | Pocket book of hospital (2005) | Pocket book of hospital care for children: guidelines for the management of common illnesses with limited resources                                                                                                                       | Not original research                                            |
| 58 | Porter (2003)                  | Networking for health: a r/evolution. Using new ICTs to support health professionals in developing countries                                                                                                                              | Not about using information for prescribing during consultations |
| 59 | Shahid (2016)                  | A study of prescription auditing in rural health care setting of north India                                                                                                                                                              | Not about using information for prescribing during consultations |
| 60 | Shahid (2017)                  | Evaluation of prescription errors at healthcare system in Khyber Pakhtunkhwa (KPK) Pakistan                                                                                                                                               | Not about using information for prescribing during consultations |
| 61 | Shahniari (2015)               | The survey of physicians' satisfaction of implementing interventions for changing prescribing behaviour toward rational medicine use-2014                                                                                                 | Not in a LMIC                                                    |
| 62 | Shanta (2013)                  | Tuberculosis management practices by private practitioners in Andhra Pradesh, India                                                                                                                                                       | Not about using information for prescribing during consultations |
| 64 | Shaun (2004)                   | Physician behaviour for antimicrobial prescribing for paediatric upper respiratory tract infections: a survey in general practice in Trinidad, West Indies                                                                                | Not about using information for prescribing during consultations |
| 65 | Shehzadi (2005)                | Knowledge regarding management of tuberculosis among general practitioners in northern areas of Pakistan                                                                                                                                  | Not about using information for prescribing during consultations |
| 66 | Singh (2016)                   | Assessment of the degree of awareness among physicians and patients about drug package inserts                                                                                                                                            | Hospital setting                                                 |
| 67 | Smith (2007)                   | Access to electronic health knowledge in five countries in Africa: a descriptive study                                                                                                                                                    | Hospital setting                                                 |
| 68 | Soleymani (2017)               | Evaluating physicians' perception of limitations and obstacles against the effectiveness of 'audit and feedback' and 'printed education materials' interventions on prescribing behaviour: a qualitative study                            | Not in a LMIC                                                    |
| 69 | Thanuskodi (2012)              | Use of internet and electronic resources among medical professionals with special reference to Tamil Nadu: a case study                                                                                                                   | Not about using information for prescribing during consultations |
| 70 | Tomlinson (2013)               | Value of a mobile information system to improve quality of care by community health workers                                                                                                                                               | Not about using information for prescribing during consultations |
| 72 | Ukachi (2011)                  | Librarians and Health Workers: Partnering and Collaborating to Support Free Access to Health Information in Nigeria                                                                                                                       | Not about using information for prescribing during consultations |
| 73 | Umeano-Enemuoh                 | A qualitative study on health workers' and community members' perceived sources, role of information and                                                                                                                                  | Not about using information for                                  |

|    |                  |                                                                                                                                                                         |                                                                                        |
|----|------------------|-------------------------------------------------------------------------------------------------------------------------------------------------------------------------|----------------------------------------------------------------------------------------|
|    | (2015)           | communication on malaria treatment, prevention and control in southeast Nigeria                                                                                         | prescribing during consultations                                                       |
| 75 | Vedanthan (2015) | Usability and feasibility of a tablet-based Decision-Support and Integrated Record-keeping (DESIRE) tool in the nurse management of hypertension in rural western Kenya | Not about using information for prescribing during consultations                       |
| 77 | Wallis (2016)    | A Smartphone App and Cloud-Based Consultation System for Burn Injury Emergency Care                                                                                     | Not about using information for prescribing during consultations                       |
| 78 | Walter (2009)    | Why first-level health workers fail to follow guidelines for managing severe disease in children in the Coast Region, the United Republic of Tanzania                   | Not about using information for prescribing during consultations                       |
| 79 | Workneh (2016)   | Influence of Medical Representatives on Prescribing Practices in Mekelle, Northern Ethiopia                                                                             | Not about using information for prescribing during consultations                       |
| 80 | Wun (2002)       | Determinants of physicians' attitude towards prescribing                                                                                                                | Not in a LMIC                                                                          |
| 81 | Ye-Ebiyo (2008)  | Study on Health Extension Workers: Access to Information, Continuing Education and Reference Materials                                                                  | Not about using information for prescribing during consultations                       |
| 82 | Yeshalem (2017)  | Knowledge of health professionals on folic acid use and their prescribing practice in Bahir Dar city administration, Northwest Ethiopia: cross-sectional study          | Not about using information for prescribing during consultations                       |
| 83 | Zaid (2010)      | Appropriate use of oral drops: perception of health professionals and assessment of package insert information                                                          | Not about using information for prescribing during consultations                       |
| 84 | Zaid (2010)      | Attitude and perception of patients and health care practitioners toward oral sustained release dosage forms in Palestine                                               | Not about using information for prescribing during consultations                       |
| 85 | Abegaz (2016)    | Management of children's acute diarrhea by community pharmacies in five towns of Ethiopia: simulated client case study                                                  | Not about using information for prescribing during consultations                       |
| 86 | Abuya (2004)     | Quality of care provided to febrile children presenting in rural private clinics on the Kenyan coast                                                                    | Not about using information for prescribing during consultations                       |
| 88 | Ahmed (2009)     | Awareness, attitude and practices concerning the essential medicines concept among Malaysian prescribers and pharmacists                                                | Not about using information for prescribing during consultations                       |
| 89 | Akhter (2007)    | Quality of diabetes care and management of general physicians in Karachi, Pakistan: Response to Nagpal and Bhartia                                                      | not the original research paper, the original report does not meet our criteria either |
| 90 | Akoria (2008)    | Prescription writing in public and private hospitals in Benin City, Nigeria: the effects of an educational intervention                                                 | Hospital setting                                                                       |
| 91 | Baik (2010)      | Reinvention of Depression Instruments by Primary Care Clinicians                                                                                                        | Not in a LMIC                                                                          |
| 92 | Chen (2013)      | General practitioners' hypertension knowledge and training needs: a survey in Xuhui district, Shanghai                                                                  | Not about using information for prescribing during consultations                       |
| 93 |                  | Irrational drug use - a pilot prescription study from Calicut, Kerala                                                                                                   | Hospital setting                                                                       |
| 94 | Đorđević (2006)  | Characteristic of Decision Making Process during Prescribing                                                                                                            | Not in a LMIC                                                                          |
| 96 | Hong Ho (2009)   | Patient needs and sources of drug information in Singapore: is the Internet replacing former sources?                                                                   | Not in a LMIC                                                                          |
| 97 | Horwood (2003)   | Diagnosis of paediatric HIV infection in a primary health care setting with a clinical algorithm                                                                        | Not about using information for prescribing during consultations                       |
| 98 | Horwood (2009)   | Paediatric HIV management at primary care level: an evaluation of the integrated management of childhood illness (IMCI) guidelines for HIV                              | Not about using information for prescribing during consultations                       |
| 99 | Hoshide (2016)   | Treatment Considerations of Clinical Physician on Hypertension Management in Asia                                                                                       | Not about using information for                                                        |

|     |                       |                                                                                                                                                               |                                                                     |
|-----|-----------------------|---------------------------------------------------------------------------------------------------------------------------------------------------------------|---------------------------------------------------------------------|
|     |                       |                                                                                                                                                               | prescribing during consultations                                    |
| 100 | Lipinge (2012)        | The delivery and quality of sexually transmitted infections treatment by private general practitioners in Windhoek Namibia                                    | Not about using information for prescribing during consultations    |
| 101 | Hussain (2011)        | Medication counselling and dispensing practices at community pharmacies: a comparative cross sectional study from Pakistan                                    | Not about using information for prescribing during consultations    |
| 102 | Jamshed (2009)        | Observation at a medical store in Karachi, Pakistan                                                                                                           | Not original research                                               |
| 103 | Ojo (2014)            | Prescription practices and perceptions of health care professionals regarding rational drug use                                                               | Not about using information for prescribing during consultations    |
| 104 | Clifton (2009)        | Prescribing antibiotics for sore throat: adherence to guidelines in patients admitted to hospital                                                             | Not in a LMIC                                                       |
| 105 | Jensen (2011)         | A basic diagnostic headache diary (BDHD) is well accepted and useful in the diagnosis of headache. a multicentre European and Latin American study            | Not about using information for prescribing during consultations    |
| 106 | Kamat (2010)          | Soft targets or partners in health? Retail pharmacies and their role in Tanzania's malaria control program                                                    | Not about using information for prescribing during consultations    |
| 108 | Katende-Kyenda (2006) | Inappropriateness of antimicrobial prescription in private primary health care settings in South Africa                                                       | Not about using information for prescribing during consultations    |
| 109 | Khan (2016)           | Prescribing pattern and drug-drug interactions of analgesics prescribed for pain management in A Pakistani Tertiary Hospital                                  | Hospital setting                                                    |
| 110 | Kotwani (2012)        | Irrational use of antibiotics and role of the pharmacist: an insight from a qualitative study in New Delhi, India                                             | Not about using information for prescribing during consultations    |
| 111 | Kotwani (2012)        | Antibiotic prescribing practices of primary care prescribers for diarrhoea in New Delhi, India                                                                | Not about using information for prescribing during consultations    |
| 112 | Williams (2017)       | Challenges in diagnosing and treating snakebites in a rural population of Tamil Nadu, India: The views of clinicians                                          | Not about prescribing information during primary care consultations |
| 114 | Bashrahil (2007)      | Indicators of rational drug use and health services in Hadramout, Yemen                                                                                       | Not about using information for prescribing during consultations    |
| 115 | Bautista (2017)       | Nurses' use of mobile instant messaging applications: A uses and gratifications perspective                                                                   | Hospital setting                                                    |
| 116 | Ganatra (2005)        | Availability of medical abortion pills and the role of chemists: a study from Bihar and Jharkhand, India                                                      | Not about using information for prescribing during consultations    |
| 117 | Blank (2013)          | Usability of implementing a tablet-based decision support and integrated record- keeping (DESIRE) tool in the nurse management of hypertension in rural Kenya | Only tests a tool which includes treatment decision support         |
| 118 | Osemwenkha (2009)     | Assessment of the Involvement of the Community Pharmacist in the Practice of Pharmaceutical Care in Benin City, Nigeria                                       | Not about using information for prescribing during consultations    |
| 119 | Oshikoya (2011)       | Sources of drug information and their influence on the prescribing behaviour of doctors in a teaching hospital in Ibadan, Nigeria                             | Hospital setting                                                    |
| 122 | Celi (2009)           | Mobile care (Moca) for remote diagnosis and screening                                                                                                         | Not original research                                               |
| 123 | Belete (2017)         | Assessment of counseling practice in medicine retail outlets in Mekelle City, Northern Ethiopia                                                               | Not about using information for prescribing during consultations    |
