# Supplementary material for: How primary healthcare workers obtain information during consultations to aid safe prescribing in low-income and lower middle-income countries: a systematic review
Source: PubMed Central journal article supplement — BMJ Glob Health. 2020 Apr 2;5(4):e002094. doi: 10.1136/bmjgh-2019-002094 (PMC7170426; doi:10.1136/bmjgh-2019-002094), 2020-04-02
Supplement: bmjgh-2019-002094supp003.pdf [file bmjgh-2019-002094supp003.pdf]

## Supplementary File 3: Quality Assessment of included studies

Table 1 Quality assessment of quantitative intervention studies

| ID  | Author, year          | Study design     | Selection bias related to participants | Selection bias related to intervention | Performance and detection bias | Attrition bias | Reporting bias | Other bias |
|-----|-----------------------|------------------|----------------------------------------|----------------------------------------|--------------------------------|----------------|----------------|------------|
| 39  | Rambaud-Althaus 2017* | RCT              | Low                                    | Unclear                                | Unclear                        | Low            | Unclear        | High       |
| 120 | Palazuelos 2013**     | Comparison       | High                                   | High                                   | High                           | Low            | NA             | Low        |
| 2   | Abouda 2015**         | Before and after | Low                                    | NA                                     | High                           | Unclear        | NA             | Low        |
| 125 | Segal 2015***         | Before and after | Low                                    | NA                                     | High                           | Low            | NA             | Low        |
| 87  | Adams 2012***         | Evaluation       | Low                                    | NA                                     | High                           | High           | NA             | High       |
| 47  | Praveen 2014***       | Evaluation       | High                                   | NA                                     | High                           | Low            | NA             | High       |
| 121 | Catalani 2014***      | Evaluation       | High                                   | NA                                     | High                           | Low            | NA             | High       |

\* Cochrane Collaboration tool for assessing risk of bias (11).

\*\* risk of bias in non-randomised studies of interventions (ROBINS-I) (14)

\*\*\*risk of bias in non-randomised studies of interventions (ROBINS-I) (14) without selection bias related to the intervention as there was no comparison group

Table 2 Quality assessment of qualitative studies using an adapted version of the Critical Appraisal Skills Programme (CASP) tool for qualitative studies (15)

| ID  | Author, year  | Study design                         | Clear statement of aims | Qualitative methodology appropriate | Research design appropriate | Recruitment strategy appropriate | Data collected addressed issue | Relationship between researcher and participants considered |
|-----|---------------|--------------------------------------|-------------------------|-------------------------------------|-----------------------------|----------------------------------|--------------------------------|-------------------------------------------------------------|
| 63  | Shao 2015     | In-depth interviews and focus groups | Yes                     | Yes                                 | Unclear                     | Yes                              | Yes                            | Unclear                                                     |
| 124 | Bessat 2019   | In-depth interviews and focus groups | Yes                     | Yes                                 | Unclear                     | No                               | Yes                            | Yes                                                         |
| 8   | Agbo 2012     | Semi-structured interviews           | Yes                     | Unclear                             | Unclear                     | Unclear                          | Yes                            | Unclear                                                     |
| 126 | Oduor 2019    | Semi-structured interviews           | Yes                     | Yes                                 | Unclear                     | Yes                              | Yes                            | Unclear                                                     |
| 41  | Reynolds 2013 | Semi-structured interviews           | Yes                     | Yes                                 | Unclear                     | Yes                              | Yes                            | Unclear                                                     |
| 53  | Iqbal 2013    | Focus groups                         | Yes                     | Unclear                             | Yes                         | Yes                              | Yes                            | Unclear                                                     |
| 49  | Park 2016     | Focus groups                         | Yes                     | Yes                                 | Unclear                     | Yes                              | Yes                            | Unclear                                                     |

Table 3 Quality assessment of survey studies a critical appraisal tool to assess the quality of cross-sectional studies (AXIS) (16)

| ID  | Author, year | Study design                                                                                                 | Clear statement of aims | Research design appropriate | Sample size justified | Sample frame appropriate | Selection appropriate | Non-responders addressed | Outcomes measured appropriately | Statistical significance determined |
|-----|--------------|--------------------------------------------------------------------------------------------------------------|-------------------------|-----------------------------|-----------------------|--------------------------|-----------------------|--------------------------|---------------------------------|-------------------------------------|
| 71  | Udezi        | Quantitative cross-sectional survey                                                                          | Yes                     | Unclear                     | No                    | Yes                      | Yes                   | Yes                      | Yes                             | Yes                                 |
| 127 | Anasi        | Quantitative cross-sectional survey                                                                          | Yes                     | Unclear                     | No                    | Unclear                  | Unclear               | No                       | Unclear                         | Yes                                 |
| 76  | Wabe         | Quantitative cross-sectional survey                                                                          | Yes                     | Unclear                     | No                    | Unclear                  | Unclear               | No                       | No                              | Yes                                 |
| 113 | Gelayee      | Quantitative cross-sectional survey                                                                          | Yes                     | Unclear                     | No                    | Unclear                  | Unclear               | No                       | Yes                             | Yes                                 |
| 74  | Usanga       | Quantitative cross-sectional survey                                                                          | Yes                     | Unclear                     | No                    | Yes                      | Yes                   | No                       | Yes                             | Yes                                 |
| 107 | Kamuhamba    | Quantitative cross-sectional survey                                                                          | Yes                     | Unclear                     | No                    | Yes                      | Yes                   | No                       | Unclear                         | Yes                                 |
| 31  | Rusatira     | Mixed methods: online survey and interviews                                                                  | Yes                     | Yes                         | No                    | Yes                      | Yes                   | No                       | Unclear                         | No                                  |
| 95  | Graham       | Mixed methods; observation of consultations with structured questionnaire, focus groups, in-depth interviews | Yes                     | Yes                         | Yes                   | Yes                      | Yes                   | No                       | Yes                             | Yes                                 |
| 21  | Samiak       | Mixed methods; semi qualitative cross-sectional survey                                                       | Yes                     | Unclear                     | No                    | Unclear                  | Yes                   | No                       | Unclear                         | Yes                                 |
