# Supplementary material for: How primary healthcare workers obtain information during consultations to aid safe prescribing in low-income and lower middle-income countries: a systematic review
Source: PubMed Central journal article supplement — BMJ Glob Health. 2020 Apr 2;5(4):e002094. doi: 10.1136/bmjgh-2019-002094 (PMC7170426; doi:10.1136/bmjgh-2019-002094), 2020-04-02
Supplement: bmjgh-2019-002094supp004.pdf [file bmjgh-2019-002094supp004.pdf]

## Supplementary File 4: Additional Tables with findings

Table Knowledge, behaviour and use of resources results of observational studies

| ID | Ref            | Knowledge results                         | Knowledge results      |                            |                              |
|----|----------------|-------------------------------------------|------------------------|----------------------------|------------------------------|
|    |                |                                           | Number of participants | Proportion of participants | Total number of participants |
| 76 | Wabe 2011 (16) | Lack of knowledge and updated information | 28                     | 44%                        | 64                           |

| ID | Ref              | Behaviour results   | Behaviour results      |                            |                              |
|----|------------------|---------------------|------------------------|----------------------------|------------------------------|
|    |                  |                     | Number of participants | Proportion of participants | Total number of participants |
| 21 | Samiak 2000 (22) | Have book with them | 93                     | 88%                        | 106                          |

| ID  | Ref                | Resources results                                                                                                                                                                                                                                                                                                                                                                                                                                                                                                                                                                                                                                                                                                                                                                                                                                                                | Resources results      |                            |                              |
|-----|--------------------|----------------------------------------------------------------------------------------------------------------------------------------------------------------------------------------------------------------------------------------------------------------------------------------------------------------------------------------------------------------------------------------------------------------------------------------------------------------------------------------------------------------------------------------------------------------------------------------------------------------------------------------------------------------------------------------------------------------------------------------------------------------------------------------------------------------------------------------------------------------------------------|------------------------|----------------------------|------------------------------|
|     |                    |                                                                                                                                                                                                                                                                                                                                                                                                                                                                                                                                                                                                                                                                                                                                                                                                                                                                                  | Number of participants | Proportion of participants | Total number of participants |
| 74  | Usanga 2007 (18)   | Pharmacies with internet access                                                                                                                                                                                                                                                                                                                                                                                                                                                                                                                                                                                                                                                                                                                                                                                                                                                  | 28                     | 61%                        | 46                           |
|     |                    | Pharmacies with networked computers                                                                                                                                                                                                                                                                                                                                                                                                                                                                                                                                                                                                                                                                                                                                                                                                                                              | 33                     | 72%                        | 46                           |
|     |                    | Electronic database access                                                                                                                                                                                                                                                                                                                                                                                                                                                                                                                                                                                                                                                                                                                                                                                                                                                       | 3                      | 7%                         | 46                           |
| 113 | Gelayee 2017 (17)  | Internet service to the pharmacy                                                                                                                                                                                                                                                                                                                                                                                                                                                                                                                                                                                                                                                                                                                                                                                                                                                 | 7                      | 15%                        | 48                           |
| 31  | Rusatira 2016 (20) | Respondents having access to wireless Internet (WiFi) in their hospitals                                                                                                                                                                                                                                                                                                                                                                                                                                                                                                                                                                                                                                                                                                                                                                                                         | 49                     | 51%                        | 97                           |
|     |                    | Only access online resources by subscriber identification module (SIM)-card powered devices (mobile phones, modems, and tablets)                                                                                                                                                                                                                                                                                                                                                                                                                                                                                                                                                                                                                                                                                                                                                 | 28                     | 29%                        | 97                           |
| 49  | Park 2016 (27)     | Most hospitals had access to the Internet but actual daily use at work was largely limited by technical installation issues, connection, password access, costs, lack of time, and lack of devices. This was illustrated best by a comment from a medical officer at a hospital, "Unfortunately there was no Internet access. . . and my patient was in critical condition." Overall, clinics [3 of 12] and health posts [1 of 11] were lagging hospitals in terms of access. On an individual level, the majority of health workers at hospitals, clinics, and health posts had Internet access through a personal mobile device or at their residence. Most health care workers desired a smart phone with user-friendly features including fast Internet connectivity, large memory capacity, specific applications [texting, Google, Facebook], and appropriate screen size. |                        |                            |                              |

Table Knowledge, clinical and use-related results of interventional studies

| ID  | Ref                       | Knowledge results                                                                                                                                                                                                                                                                                                                                                                                                                                                                                                                                                   |
|-----|---------------------------|---------------------------------------------------------------------------------------------------------------------------------------------------------------------------------------------------------------------------------------------------------------------------------------------------------------------------------------------------------------------------------------------------------------------------------------------------------------------------------------------------------------------------------------------------------------------|
| 63  | Shao 2015 (29)            | The majority of the study participants (9 smartphone/ 11 tablet) perceived that their <u>rational judgment was not compromised</u> by using the ALMANACH during consultations. <i>"...the treatment provided by the tablet is short and clear, but there is also an opportunity to add other things [...], it helps you to think more about the treatment". (IDI, female, tablet, low uptake)</i>                                                                                                                                                                   |
| 121 | Catalani 2014 (35)        | Clinicians reported that they had <u>little special education or training</u> around tuberculosis care and were unsure about the steps for determining isoniazid preventive therapy eligibility. More than just alerts or reminders about steps missed in the past, clinicians requested proactive information about what actions to take moving forward.                                                                                                                                                                                                           |
| 2   | Abouda 2015 (31)          | All 73 general practitioners were trained on using the integrated syndromic respiratory disease guideline ....All general practitioners have expressed an <u>improvement in their knowledge</u> after training; however, 23 general practitioners think that the application of this integrated syndromic guidelines can be difficult in real situations because translation of complaints in Arabic to symptoms in French language can be confusing.                                                                                                               |
| ID  | Ref                       | Clinical results                                                                                                                                                                                                                                                                                                                                                                                                                                                                                                                                                    |
| 87  | Adams 2012 (33)           | Average <u>Patient Health Questionnaire-9 Item Scores</u> among 17 completers significantly decreased from 19.76 (3.01) at baseline to 8.12 (1.83) at week 12 ( $p < 0.001$ ).<br>All participants reported <u>100% adherence to antidepressants prescribed</u> at each time-point; however, a two-week shortage of medications meant that during one 4-week interval only two weeks' worth of medication was taken by participants.                                                                                                                                |
| 125 | Segal 2015 (32)           | Among 167 patients queried, no change in patient centredness was observed. Before and after the intervention, 100% of patients reported that their provider had resolved the issue they had come for, and that they believed their provider cared about them.                                                                                                                                                                                                                                                                                                       |
| ID  | Ref                       | Use of resources results                                                                                                                                                                                                                                                                                                                                                                                                                                                                                                                                            |
| 63  | Rambaud-Althaus 2017 (28) | The majority of the respondents (9 smartphone/11 tablet) said that smartphones and tablets <u>simplified their work</u> "... for example [...] if the patient is coughing, for each cough we gave antibiotics but through the phone you know this is pneumonia or this is normal chest cough so there is no need of using antibiotics. But another thing is that, it simplifies work because you are instructed to give medicine according to the weight of the child, so you don't need to do the calculation of a dose". (IDI, male, smartphone, very low uptake) |
| 2   | Catalani 2014 (35)        | The number of drugs prescribed per patient who received drug prescription decreased by 18.8% in the impact survey (3.2 vs. 2.6, $P < 0.001$ ).<br><u>The average cost of drug prescription per patient who was prescribed any drug</u> was reduced by 19.3% in the impact survey from 8.2 to 6.75 Tunisian dinars ( $P < 0.001$ ).                                                                                                                                                                                                                                  |
| 47  | Abouda 2015 (31)          | For the doctors, the tablet appeared to <u>enhance workflow</u> and was viewed as a <u>time-saver</u> . It also increased their confidence in communicating with patients.                                                                                                                                                                                                                                                                                                                                                                                          |
| 125 | Bessat 2019 (36)          | Overall, the app yielded <u>consults were, on average, 1.5 min shorter</u> than consults without the app ( $-1.53$ ; 95% CI $-2.07$ to $-0.99$ ; $p < 0.0001$ ).                                                                                                                                                                                                                                                                                                                                                                                                    |
